# Supplementary material for: Neonatal Cardiovascular-Progenitor-Cell-Derived Extracellular Vesicles Activate YAP1 in Adult Cardiac Progenitor Cells
Source: MDPI journal article supplement (doi:10.3390/ijms24098088), 2023-04-30
Supplement: s1 [file s1]

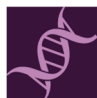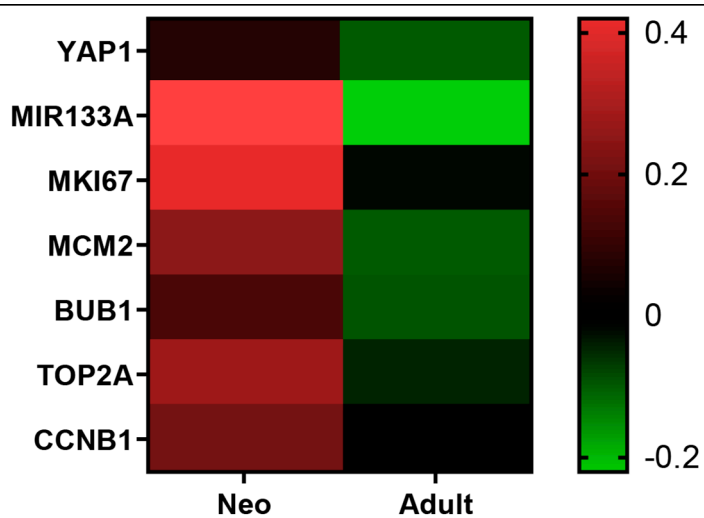

**Supplementary Figure S1.** Neonatal Islet-1+ CPC derived extracellular vesicles carry YAP1 and are enriched with transcripts that promote proliferation.
